# Supplementary material
Source: PubMed Central journal article supplement (PMC8576592)

# Supplementary Fig.1. Chest radiograph of the study patients before admission and during follow-up

## A. Patient 1

3 months before onset

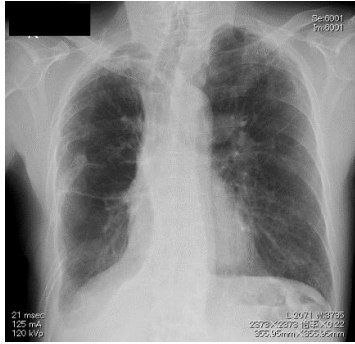

2 weeks after vaccination

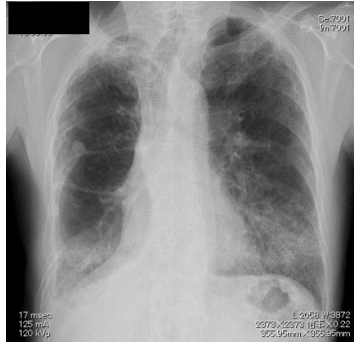

2 months after vaccination

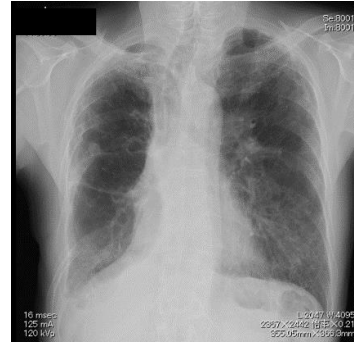

## B. Patient 2

18 months before onset

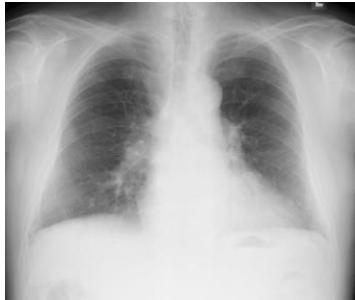

1 month after vaccination

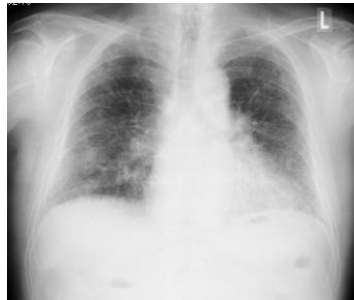

1 month after steroid administration

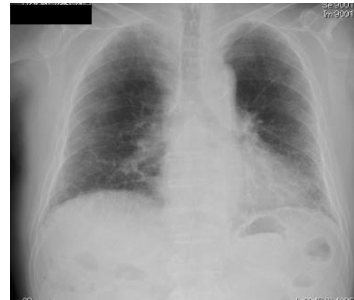

## C. Patient 3

3 months before onset

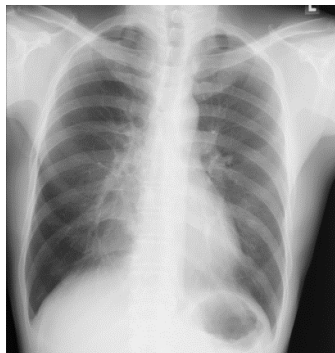

10 days after second vaccination

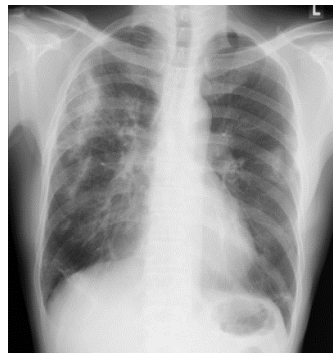

10 days after steroid administration

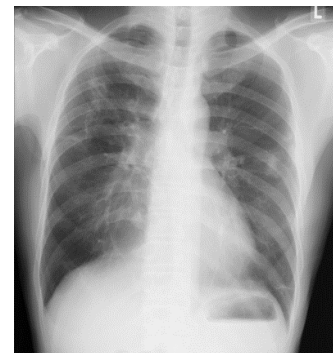

Supplement: mmc1.pdf [file mmc1.pdf]
